# Supplementary material
Source: MDPI journal article supplement (https://www.mdpi.com/2075-163X/13/8/1016)
Supplement: s1 [file s1]

# CO<sub>2</sub> Leakage Scenarios in Shale Overburden

Gilda Currenti <sup>1,\*</sup>, Barbara Cantucci <sup>1</sup>, Giordano Montegrossi <sup>2,3</sup>, Rosalba Napoli <sup>1</sup>, M. Shahir Misnan <sup>4</sup>, M. Rashad Amir Rashidi <sup>4</sup>, Zainol Affendi Abu Bakar <sup>4</sup>, Zuhar Zahir Tuan Harith <sup>5</sup>, Nabila Hannah Samsol Bahri <sup>5</sup> and Noorbaizura Hashim <sup>5</sup>

<sup>1</sup> Istituto Nazionale di Geofisica e Vulcanologia, Via di Vigna Murata 605, 00143, Rome, Italy; barbara.cantucci@ingv.it (B.C.); rosalba.napoli@ingv.it (R.N.)

<sup>2</sup> Centro Nazionale delle Ricerche-Istituto di Geoscienze e Georisorse, Via G. La Pira 4, 50121 Firenze, Italy; giordano.montegrossi@igg.cnr.it

<sup>3</sup> Consorzio Interuniversitario Nazionale per la Scienza e Tecnologia dei Materiali–INSTM, Via G. Giusti 9, 50121 Firenze, Italy

<sup>4</sup> PETRONAS Research Sdn. Bhd, Bandar Baru Bangi 43650, Malaysia; shahir.misnan@petronas.com (M.S.M.); mrashad.amirrashidi@petronas.com (M.R.A.R.); zainolaffendi\_abubakar@petronas.com (Z.A.A.B.)

<sup>5</sup> AEM Energy Solutions Sdn. Bhd, Kuala Lumpur 50450, Malaysia; zahir.harith@gmail.com (Z.Z.T.H.); nabila.sbj@aemenersol.com (N.H.S.B.); noorbaizura.hashim@aemenersol.com (N.H.)

\* Correspondence: gilda.currenti@ingv.it

## Supplementary Material

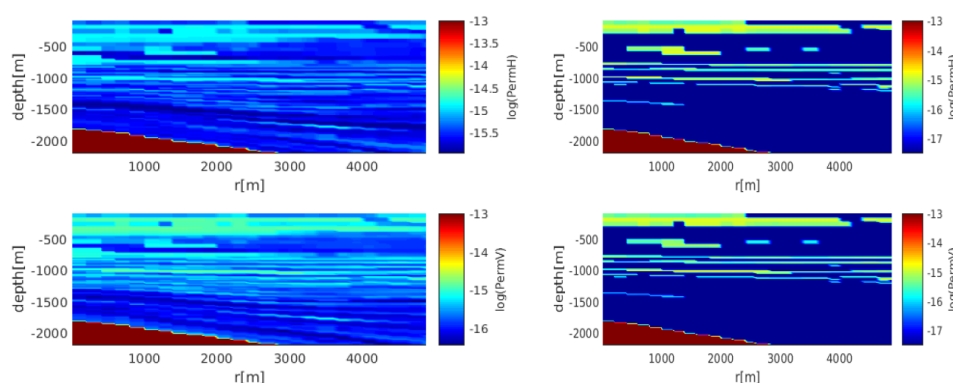

**Figure S1.** Scenario 1. Vertical (permV) and horizontal (permH) permeability distribution in Models A (a) and B (b) along the E-W section.

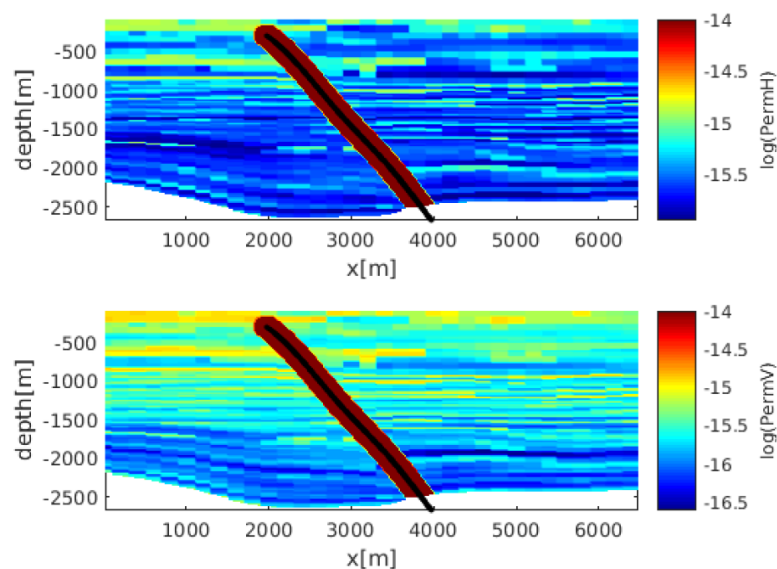

**Figure S2.** Scenario 2. Vertical (permH) and horizontal (permH) permeability distribution in Model A along the E-W section.

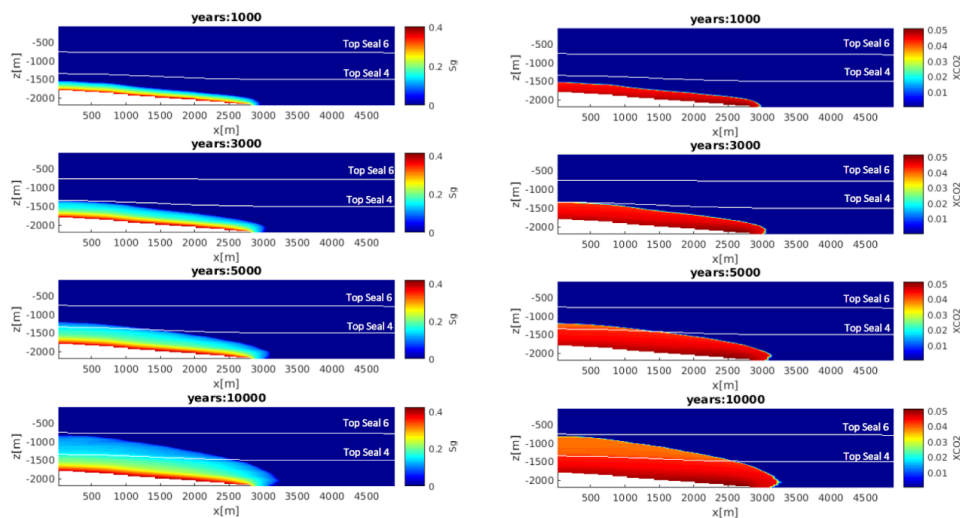

**Figure S3.** Scenario 1, E-W section, permeability Model A. (a) Gas saturation ( $S_g$ ) and (b)  $\text{CO}_2$  mass fraction ( $X_{\text{CO}_2}$ ) distribution over time.

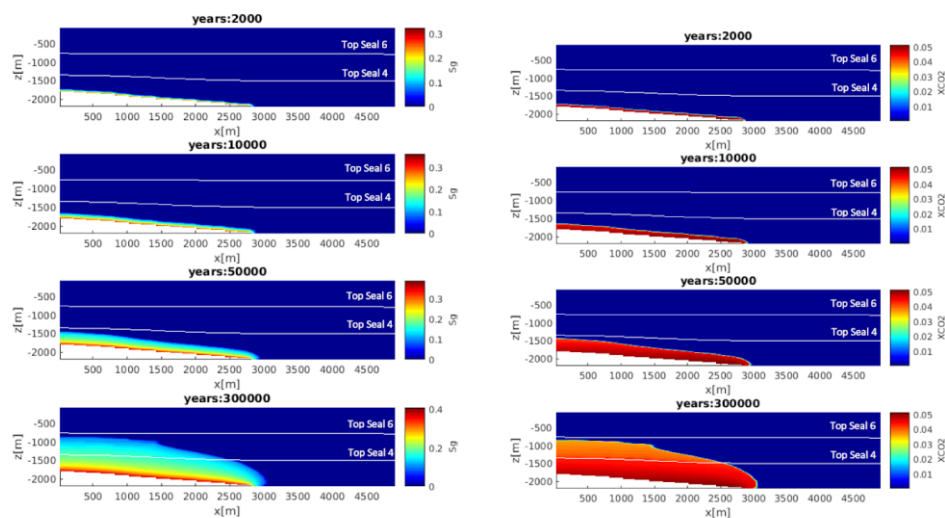

**Figure S4.** Scenario 1, E-W section, permeability Model B. (a) Gas saturation ( $S_g$ ) and (b)  $\text{CO}_2$  mass fraction ( $X_{\text{CO}_2}$ ) distribution over time.

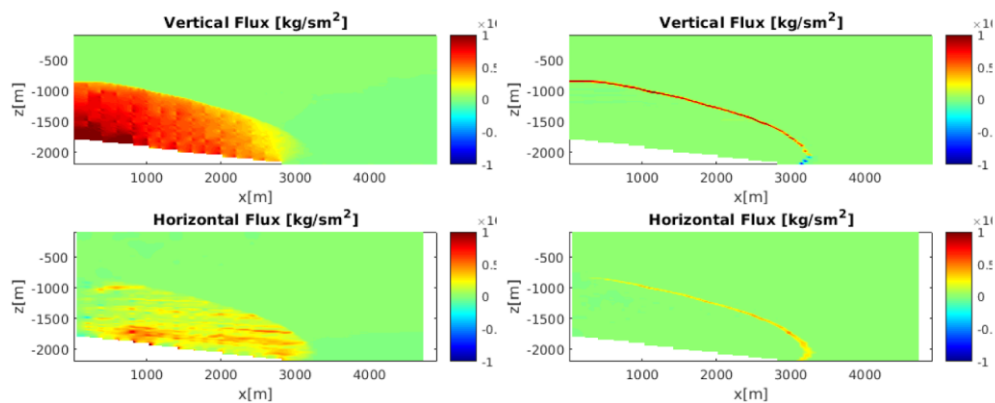

**Figure S5.** Scenario 1, E-W section, permeability Model A. (a) Darcy fluxes and (b) diffusive fluxes after 300,000 years.

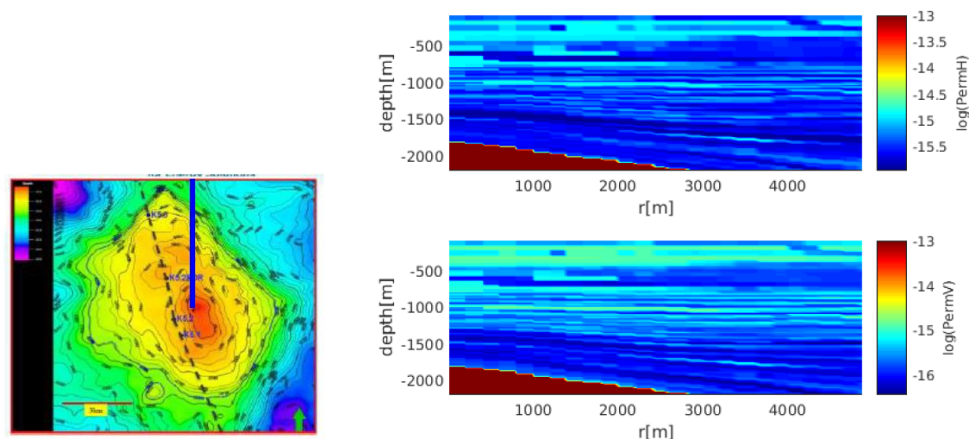

**Figure S6.** Scenario 1: (a) the N-S section running from the center of the reservoir top. (b) Horizontal (permH) and vertical (permV) permeabilities distribution for Model A interpolated on the computational domain derived for the section.

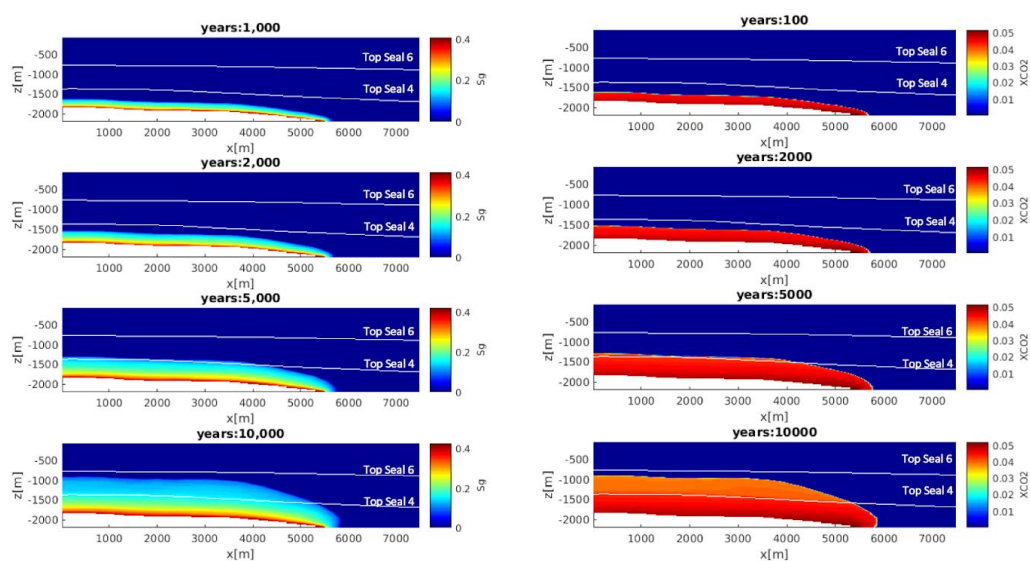

**Figure S7.** Scenario 1, N-S section, permeability Model A. Distribution of: (a) gas saturation ( $S_g$ ) and (b) CO<sub>2</sub> mass fraction ( $X_{CO_2}$ ) in the liquid phase at different time steps.

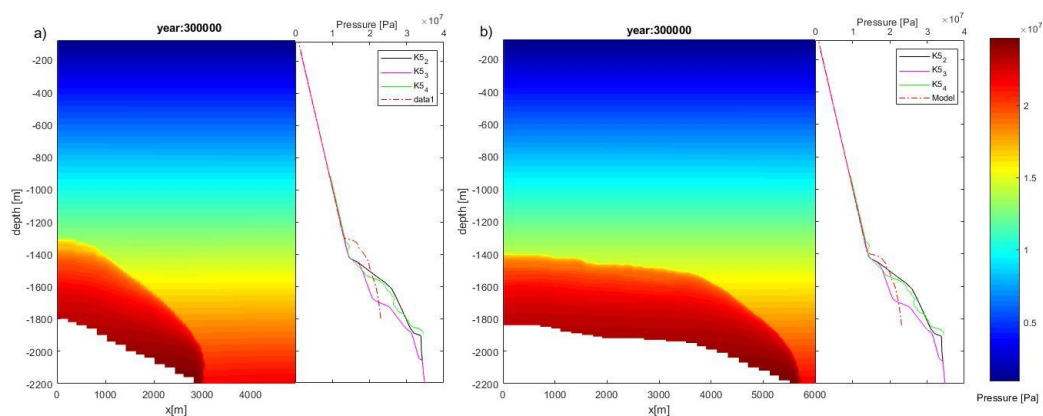

**Figure S8.** Scenario 1, permeability Model A. Pore pressure distribution measured in the three wells with respect to simulated ones at steady state. (a) E-W section; (b) N-S section.

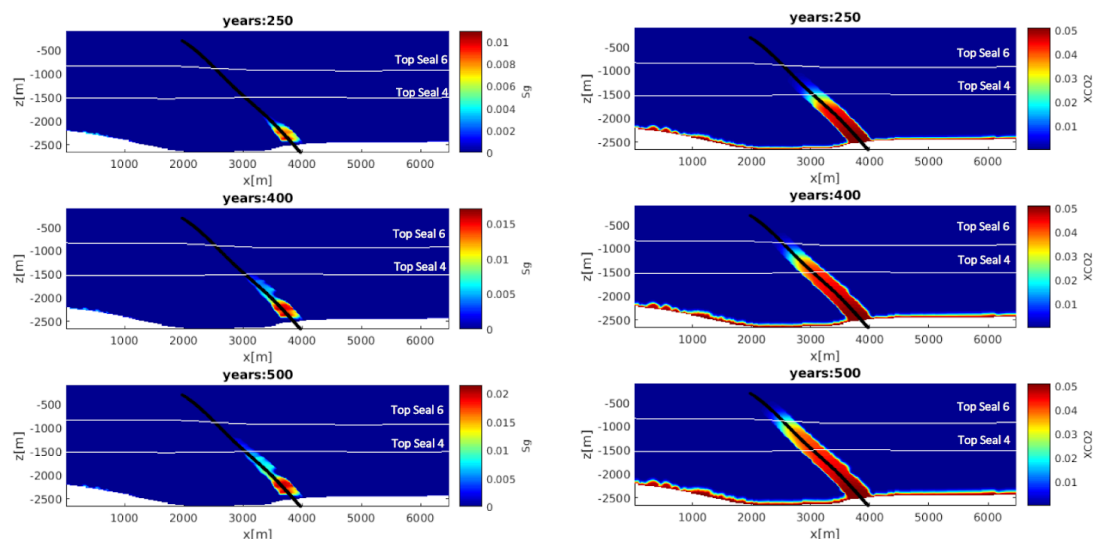

**Figure S9.** Scenario 2, permeability Model A. Distribution of: (a) gas saturation ( $S_g$ ) and (b)  $\text{CO}_2$  mass fraction ( $X_{\text{CO}_2}$ ) in the liquid phase at different time steps.
